# Supplementary material for: Human Soluble Recombinant Thrombomodulin, ART-123, Resolved Early Phase Coagulopathies, but Did Not Significantly Alter the 28 Day Outcome in the Treatment of DIC Associated with Infectious Systemic Inflammatory Response Syndromes
Source: MDPI journal article supplement (doi:10.3390/jcm8101553), 2019-09-27
Supplement: s1 [file s1]

## Supplementary Information for

### Human Soluble Recombinant Thrombomodulin, ART-123, Resolved Early Phase Coagulopathies, but Did Not Significantly Alter the 28 Day Outcome in the Treatment of DIC Associated with Infectious Systemic Inflammatory Response Syndromes

Shusuke Mori \*, Tomohiko Ai, Toshiki Sera, Kanae Ochiai and Yasuhiro Otomo

#### Supplementary Table 1

**Table S1.** International Society on Thrombosis and Hemostasis (ISTH) score.

|                                   | Point |
|-----------------------------------|-------|
| Platelet count (/μL)              |       |
| >100,000                          | 0     |
| 50,000–100,000                    | 1     |
| <50,000                           | 2     |
| Fibrin-related marker             |       |
| No change                         | 0     |
| Moderate rise                     | 2     |
| Strong rise                       | 3     |
| Prothrombin time prolongation (s) |       |
| ≤3                                | 0     |
| >3 but <6                         | 1     |
| ≥6                                | 2     |
| Fibrinogen (g/L)                  |       |
| >1                                | 0     |
| <1                                | 1     |
| DIC is not overt                  | 0–4   |
| DIC is probable                   | 5–8   |
